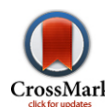

# Electrochemical and Thermodynamic Properties of Ln(III) (Ln = Eu, Sm, Dy, Nd) in 1-Butyl-3-Methylimidazolium Bromide Ionic Liquid

Xiao Yang<sup>1</sup>, Ling He<sup>1</sup>, Song Qin<sup>1</sup>, Guo-Hong Tao<sup>1\*</sup>, Ming Huang<sup>2</sup>, Yi Lv<sup>1\*</sup>

<sup>1</sup> College of Chemistry, Sichuan University, Chengdu, Sichuan, China, <sup>2</sup> Institute of Chemical Materials, China Academy of Engineering Physics, Mianyang, Sichuan, China

## Abstract

The electrochemical behavior and thermodynamic properties of Ln(III) (Ln = Eu, Sm, Dy, Nd) were studied in 1-butyl-3-methylimidazolium bromide ionic liquid (BmimBr) at a glassy carbon (GC) electrode in the range of 293–338 K. The electrode reaction of Eu(III) was found to be quasi-reversible by the cyclic voltammetry, the reactions of the other three lanthanide ions were regarded as irreversible systems. An increase of the current intensity was obtained with the temperature increase. At 293 K, the cathodic peak potentials of  $-0.893$  V (Eu(III)),  $-0.596$  V (Sm(III)),  $-0.637$  V (Dy(III)) and  $-0.641$  V (Nd(III)) were found, respectively, to be assigned to the reduction of Ln(III) to Ln(II). The diffusion coefficients ( $D_0$ ), the transfer coefficients ( $\alpha$ ) of Ln(III) (Ln = Eu, Sm, Dy, Nd) and the charge transfer rate constants ( $k_s$ ) of Eu(III) were estimated. The apparent standard potential ( $E^{0*}$ ) and the thermodynamic properties of the reduction of Eu(III) to Eu(II) were also investigated.

**Citation:** Yang X, He L, Qin S, Tao G-H, Huang M, et al. (2014) Electrochemical and Thermodynamic Properties of Ln(III) (Ln = Eu, Sm, Dy, Nd) in 1-Butyl-3-Methylimidazolium Bromide Ionic Liquid. PLoS ONE 9(4): e95832. doi:10.1371/journal.pone.0095832

**Editor:** Andrew C. Marr, Queen's University Belfast, United Kingdom

**Received:** July 2, 2013; **Accepted:** March 31, 2014; **Published:** April 21, 2014

**Copyright:** © 2014 Yang et al. This is an open-access article distributed under the terms of the Creative Commons Attribution License, which permits unrestricted use, distribution, and reproduction in any medium, provided the original author and source are credited.

**Funding:** G.H.T. gratefully acknowledges the financial support of the National Natural Science Foundation of China (No. 21103116 and J1210004), and the Specialized Research Fund for the Doctoral Program of Higher Education (No. 20100181120042). The funders had no role in study design, data collection and analysis, decision to publish, or preparation of the manuscript.

**Competing Interests:** The authors have declared that no competing interests exist.

\* E-mail: taogh@scu.edu.cn (GHT); lvy@scu.edu.cn (YL)

## Introduction

Ionic liquids (ILs) have attracted much attention in recent years as interesting soft materials including solvents [1–7], catalysts [8–15], lubricants [16], electrolytes [17–21], extractants [22–23], magnetic fluids [24–26], optical fluids [27–28], and propellants [29–33]. Compared with conventional molecular solvents, ILs have unique physical properties such as high thermal stability, large liquidus range, negligible vapor pressure, and wide electrochemical window [34–36]. ILs are typical ionic compounds, and therefore normally have high electrical conductivities and good charge transport properties. Combined with their distinctive solvation ability to a wide variety of inorganic, organic, and organometallic species, ILs have inherent advantages to be used for various electrochemical applications [37–39].

Lanthanide elements present fascinating and intricate properties in view of singular photophysical/optical, catalytic, and magnetic properties [40]. Along with the increased demand of rare earths, there is a growing interest in high pure lanthanides. Selective separation of lanthanides is necessary for their applications [41]. Furthermore, in the nuclear fuel cycle, the technology of the selective separation of lanthanides is of importance for maximum utilization of the expensive nuclear fuel resource. ILs have shown potential as a solvent in nuclear fuel reprocessing technology [42]. The separation coefficients of lanthanides are related to formal standard potentials, transfer and diffusion coefficients, and standard rate constants of charge transfer [43]. These electrochemical properties of lanthanides will be very important for the selective separation of lanthanides in ILs.

The electrochemical behavior of Ln(III) in room temperature ILs composed of bis(trifluoromethylsulfonyl)imide anion ( $\text{NTf}_2^-$ ) was studied. Yamagata et al. studied the electrochemical behavior of Eu(III), Sm(III), Yb(III) in 1-butyl-1-methylpyrrolidinium bis(trifluoromethylsulfonyl)imide ( $\text{BMPyNTf}_2$ ) and 1-ethyl-3-methylimidazolium bis(trifluoromethylsulfonyl)imide ( $\text{EMINTf}_2$ ) ILs, which exhibit large electrochemical windows [44]. The cyclic voltammograms of these lanthanide ions consisted of quasi-reversible waves that were attributed to the reduction of these trivalent lanthanides to their respective divalent states and the oxidation of divalents to their respective trivalents. The diffusion coefficients of these trivalent lanthanides in these ILs were determined to be  $\sim 10^{-8}$   $\text{cm}^2 \cdot \text{s}^{-1}$ . Rao et al. reported the electrochemical behavior of Eu(III) in  $\text{BMPyNTf}_2$  IL [45]. Cyclic voltammogram of Eu(III) consisted of a quasi-reversible cathodic wave at  $-0.45$  V (vs.  $\text{Fc}/\text{Fc}^+$ , 373 K), which could be attributed to the reduction of Eu(III) to Eu(II) and an irreversible wave at  $-2.79$  V (vs.  $\text{Fc}/\text{Fc}^+$ ) assigned to the reduction of Eu(II) to Eu(0). The diffusion coefficient of Eu(III) in  $\text{BMPyNTf}_2$  was determined to be about  $\sim 10^{-7}$   $\text{cm}^2 \cdot \text{s}^{-1}$ , and the charge transfer rate constant ( $k_s$ ) was  $\sim 10^{-5}$   $\text{cm} \cdot \text{s}^{-1}$  by cyclic voltammetry. Matsumiya et al. got the diffusion coefficients of Eu(III) and Sm(III) in  $\text{NTf}_2^-$  ILs to be  $\sim 10^{-12}$   $\text{cm}^2 \cdot \text{s}^{-1}$  [46]. Bhatt et al. studied the electrochemical behaviors of La(III), Sm(III) and Eu(III) in tetraalkylammonium bis(trifluoromethylsulfonyl)imide ILs [47–49]. The above investigations indicate that ILs are proposed as efficient candidates for high-temperature molten salts in non-aqueous reprocessing.

The relative expensive cost of ILs is a key factor limiting their applications. ILs based on  $\text{NTf}_2^-$  are high-cost, though they exhibit good fluidity. Some low-cost alternatives with good physicochemical properties are of interest. 1-Butyl-3-methylimidazolium bromide (BmimBr), is a classical ionic liquid, with a melting point of  $76^\circ\text{C}$  [50]. However, BmimBr usually exhibits supercool status as a liquid at room temperature for a long time. This ionic liquid can be obtained in a big scale with low cost via a simple synthesis route skipping the tough purification of water. Such features suggest BmimBr can be regarded as a potential candidate for industry application. Water is an inevitable impurity in nearly all ILs, even for the hydrophobic  $\text{NTf}_2^-$  and  $\text{PF}_6^-$  ILs. Small amounts of water residual in BmimBr may lead to an increase of its electrical conductivity, and a decrease of its viscosity and melting point. BmimBr obtained by simple methods is a realistic consideration in its potential applications. Herein, the electrochemical behaviors of four trivalent lanthanides, Eu(III), Sm(III), Dy(III) and Nd(III), were investigated in BmimBr by cyclic voltammetry. Their diffusion coefficients and transfer coefficients were estimated. The thermodynamic properties of Eu(III) including charge transfer rate constant, formal potential, and Gibbs energy were also studied.

## Results and Discussion

### 1. Cyclic Voltammetry

The cyclic voltammograms of Ln(III) (Ln = Eu, Sm, Dy, Nd,  $50 \text{ mmol}\cdot\text{L}^{-1}$ ) in BmimBr at 293 K are shown in Figure 1. For Eu(III), a cathodic peak and an anodic peak potentials were observed around  $-0.893 \text{ V}$  and  $-0.121 \text{ V}$ , respectively. The cathodic and anodic peaks were attributed to the reduction and oxidation of Eu(III) separately. No deposition of europium metal was observed after the potentiostatic reduction. Therefore, this result shows that the reduced product was the divalent europium complex, Eu(II). The redox reaction of the Eu(III)/Eu(II) in BmimBr is a quasi-reversible. The cyclic voltammograms of Sm(III), Dy(III) and Nd(III) gave irreversible waves. Their cathodic peak potentials were around  $-0.596 \text{ V}$  (Sm(III)),  $-0.637 \text{ V}$  (Dy(III)) and  $-0.641 \text{ V}$  (Nd(III)), respectively, which are higher than that of Eu(III). The difference in the curves of Sm(III), Dy(III) and Nd(III) is perhaps due to the instability of Sm(II), Dy(II) and Nd(II) to Eu(II). Relative to their respective trivalent states in BmimBr, leading to no anodic peak observed in the cyclic voltammograms. This property also affected the cathodic peaks of Sm(III), Dy(III) and Nd(III).

Figure 2 shows the cyclic voltammograms of  $50 \text{ mmol}\cdot\text{L}^{-1}$  Ln(III) (Ln = Eu, Sm, Dy, Nd) at various temperatures. Temperatures were well controlled and selected as 293 K, 308 K, 323 K and 338 K, respectively. For Eu(III) in BmimBr, the current intensities increased along with the rise of temperature. A similar tendency was found for the other three Ln(III): Sm(III), Dy(III) and Nd(III). This feature is associated with the mass transition caused by the viscosity of BmimBr, which depends on temperature closely [36]. Thus, the transport properties of ILs, including conductivity, diffusion coefficient, and charge transfer rate are also temperature-dependent for the variation of viscosity. For BmimBr ionic liquid, its viscosity decreased and the conductivity increased at higher temperature, which would facilitate the diffusion of trivalent lanthanide ions. The diffusion rate became greater as the temperature increased.

The cyclic voltammograms of  $50 \text{ mmol}\cdot\text{L}^{-1}$  Eu(III) in BmimBr at various scan rates are described in Figure 3. Both current intensity and peak potential were changed, along with the change

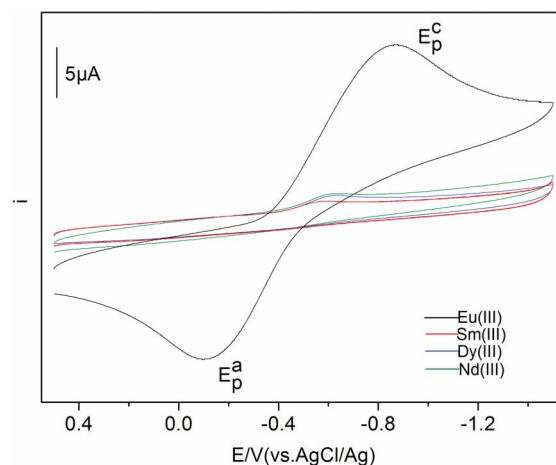

**Figure 1. Cyclic voltammograms of Eu(III), Sm(III), Dy(III) and Nd(III) measured in BmimBr at 293 K.**

doi:10.1371/journal.pone.0095832.g001

of scan rate. The cathodic and anodic peak potentials were shifted to cathode and anode, respectively, with the increase of scan rate.

The plots of cathodic peak current intensity ( $i_p$ ) against the square-root of the potential scan rate ( $v^{1/2}$ ), are shown in Figure 4. For Eu(III), a positive correlation of the current intensity with the scan rate was determined. This result indicates that the electrode reaction kinetics is controlled by the mass transport under semi-infinite linear diffusion conditions. Good linear relations were also observed for Sm(III), Dy(III) and Nd(III) in BmimBr.

### 2. Diffusion Coefficients ( $D_o$ ), Transfer Coefficients ( $\alpha$ ) and the Energy of Activation ( $E_a$ ) of Eu(III), Sm(III), Dy(III) and Nd(III) in BmimBr

From a series of electrochemical analyses, the diffusion coefficients of Ln(III) in BmimBr were estimated. For an irreversible or quasi-reversible system, the relation of the cathodic peak current and the diffusion coefficient ( $D_o$ ) can be predicted as equation (1) [51,52]:

$$i_p = 0.496nFAC_o^*D_o^{1/2}v^{1/2}\left(\frac{\alpha n_\alpha F}{RT}\right)^{1/2} \quad (1)$$

where  $A$  is the electrode area in  $\text{cm}^2$  (0.1256),  $C_o^*$  is the Ln(III) concentration in  $\text{mmol}\cdot\text{L}^{-1}$  ( $\sim 50 \text{ mmol}\cdot\text{L}^{-1}$ ),  $D_o$  is the diffusion coefficient in  $\text{cm}^2\cdot\text{s}^{-1}$ ,  $v$  is the potential scan rate in  $\text{V}\cdot\text{s}^{-1}$ ,  $F$  is the Faraday constant,  $\alpha$  is the charge transfer coefficient,  $n$  is the number of transferred electrons,  $n_\alpha$  is the number of electrons transferred in the rate determining step, and  $T$  is the absolute temperature in K. The value of  $\alpha n_\alpha$  can be estimate as equation (2) [45]:

$$|E_p^c - E_{p/2}^c| = \frac{1.857RT}{\alpha n_\alpha F} \quad (2)$$

where  $E_p^c$  is the cathodic potential,  $E_{p/2}^c$  is the half wave potential, and  $|E_p^c - E_{p/2}^c|$  is the absolute value of the difference between  $E_p^c$  and  $E_{p/2}^c$ . These data of Ln(III) recorded at different temperatures are summarized in Table 1. For Ln(III) (Ln = Eu, Sm, Dy, Nd), the value of  $n_\alpha$  is 1.

According to equations (1) and (2), the diffusion coefficients of Ln(III) in BmimBr can be estimated. The values of  $D_o$  and  $\alpha$  are given in Table 2. The diffusion coefficients can be regarded as a

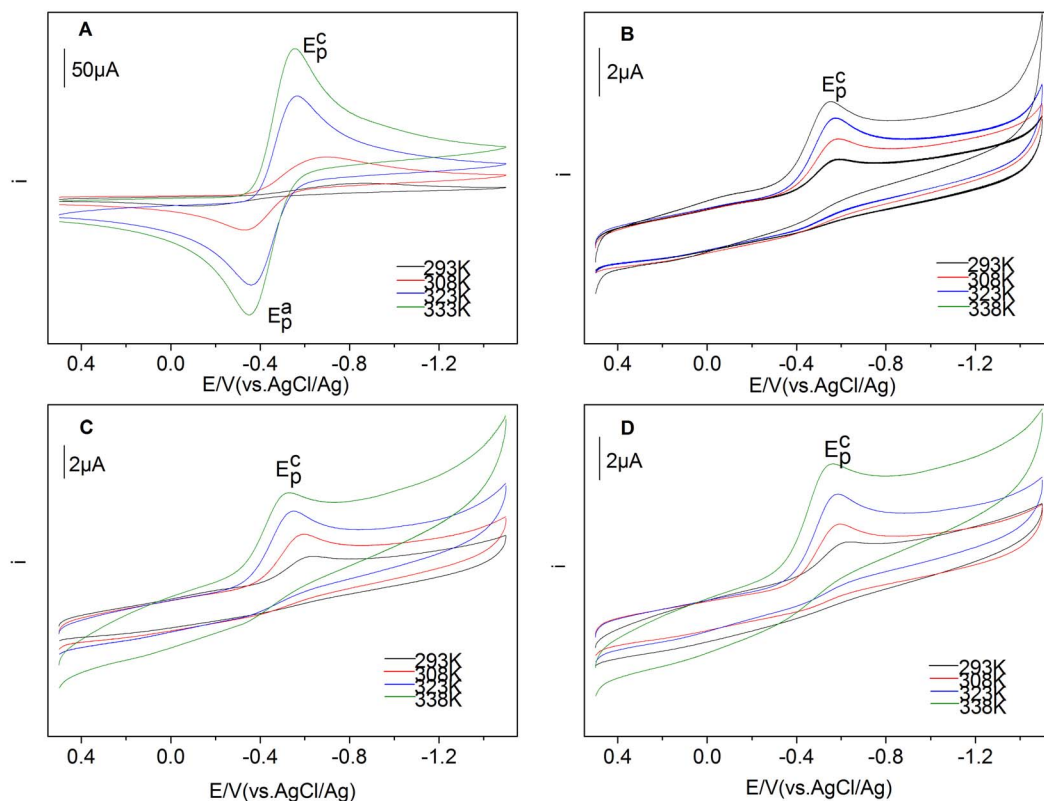

**Figure 2. Cyclic voltammograms of Eu(III) (A), Sm(III) (B), Dy(III) (C) and Nd(III) (D) measured in BmimBr at different temperatures.**  
doi:10.1371/journal.pone.0095832.g002

function of  $T$ . An increase of the diffusion coefficients and the charge transfer coefficients with temperature is observed. The diffusion coefficient of Eu(III) is about  $10^{-8} \text{ cm}^2 \cdot \text{s}^{-1}$  at 293 K, and as high as  $\sim 10^{-7} \text{ cm}^2 \cdot \text{s}^{-1}$  at higher temperature. Low viscosity of ILs at high temperature results in more efficient mass transport. Similar trends are also found for Sm(III), Dy(III) and Nd(III) in BmimBr, however, no increase in their magnitude of diffusion coefficient was found. The magnitude of diffusion coefficients of Sm(III), Dy(III) and Nd(III) is around  $10^{-10} \text{ cm}^2 \cdot \text{s}^{-1}$ , which is  $10^2 \sim 10^3$  times smaller than that of Eu(III) in BmimBr. This fact

indicates that the electrostatic interaction around Eu(III) in BmimBr may be weaker than those of Sm(III), Dy(III) and Nd(III). At 338 K, the diffusion coefficient of Eu(III) increased more than those of the other three Ln(III).

From the slope of  $\ln D_0$  against  $1/T$ , the energy of activation ( $E_a$ ) of the reduction of Ln(III) to Ln(II) can be determined. (Figure 5, Table 2) The reduction of Eu(III) to Eu(II) exhibits the highest value of  $E_a$  of  $59.09 \text{ kJ} \cdot \text{mol}^{-1}$ . While, the values of other three Ln(III) are found around  $20 \text{ kJ} \cdot \text{mol}^{-1}$  (Sm(III),  $18.94 \text{ kJ} \cdot \text{mol}^{-1}$ ;

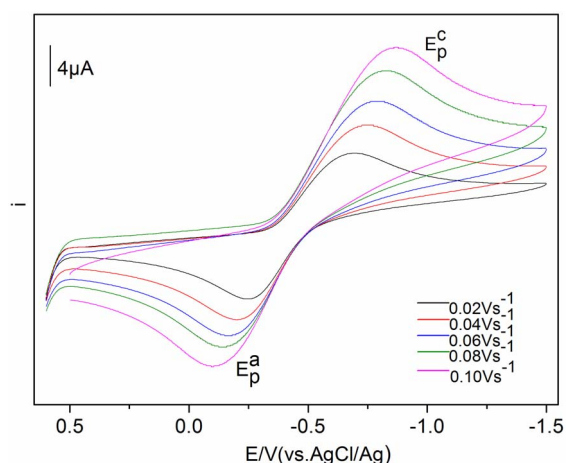

**Figure 3. Cyclic voltammograms of Eu(III) measured in BmimBr with different scan rates.**  
doi:10.1371/journal.pone.0095832.g003

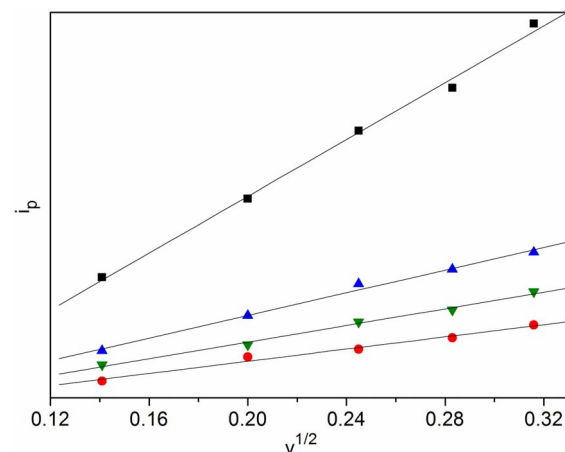

**Figure 4. Plots of cathodic peak current intensity ( $i_p$ ) against square-root of the potential scan rate ( $v^{1/2}$ ); ■, Eu(III); ●, Sm(III); ▲, Dy(III); ▼, Nd(III).**  
doi:10.1371/journal.pone.0095832.g004

**Table 1.** Peak potentials  $E_p^c$ ,  $E_{p/2}^c$  and  $|E_p^c - E_{p/2}^c|$  of Eu(III), Sm(III), Dy(III) and Nd(III) in BmimBr at different temperatures.

| Metal ion | T/K | $E_p^c/V$ | $E_{p/2}^c/V$ | $ E_p^c - E_{p/2}^c /V$ |
|-----------|-----|-----------|---------------|-------------------------|
| Eu(III)   | 293 | -0.893    | -0.582        | 0.311                   |
|           | 308 | -0.639    | -0.466        | 0.173                   |
|           | 323 | -0.565    | -0.460        | 0.105                   |
|           | 338 | -0.557    | -0.455        | 0.102                   |
| Sm(III)   | 293 | -0.596    | -0.369        | 0.227                   |
|           | 308 | -0.587    | -0.421        | 0.166                   |
|           | 323 | -0.579    | -0.430        | 0.149                   |
|           | 338 | -0.553    | -0.406        | 0.147                   |
| Dy(III)   | 293 | -0.637    | -0.412        | 0.225                   |
|           | 308 | -0.596    | -0.441        | 0.155                   |
|           | 323 | -0.551    | -0.409        | 0.142                   |
|           | 338 | -0.545    | -0.406        | 0.139                   |
| Nd(III)   | 293 | -0.641    | -0.425        | 0.216                   |
|           | 308 | -0.602    | -0.449        | 0.153                   |
|           | 323 | -0.591    | -0.442        | 0.149                   |
|           | 338 | -0.562    | -0.413        | 0.149                   |

doi:10.1371/journal.pone.0095832.t001

Dy(III), 27.22  $\text{kJ}\cdot\text{mol}^{-1}$ ; and Nd(III), 20.39  $\text{kJ}\cdot\text{mol}^{-1}$ ).

### 3. Charge Transfer Rate Constants ( $k_s$ ) of Eu(III) in BmimBr

Diffusion and charge transfer kinetics are the major factors that affect the reduction of Ln(III) to Ln(II) in BmimBr. The charge transfer rate constant ( $k_s$ ,  $\text{cm}\cdot\text{s}^{-1}$ ), associated with both diffusion coefficient and transfer coefficient, can be described as equation (3) [53]:

$$k_s = 2.18 \left[ \frac{D_o(\alpha n_z) v F}{RT} \right]^{1/2} \exp \left[ \frac{\alpha^2 n F (E_p^c - E_p^a)}{RT} \right] \quad (3)$$

The charge transfer rate constants ( $k_s$ ), the cathodic and anodic peak potentials ( $E_p^c$  and  $E_p^a$ ) of Eu(III) in BmimBr at different temperatures are given in Table 3. The magnitude of charge transfer rate constants are found to be  $\sim 10^{-5} \text{ cm}\cdot\text{s}^{-1}$ . Such data

**Table 2.** Diffusion coefficients ( $D_o$ ), transfer coefficients ( $\alpha$ ) and energy of activation ( $E_a$ ) of Eu(III), Sm(III), Dy(III) and Nd(III) in BmimBr at different temperatures.

| Metal ion | T/K | $D_o \times 10^{10} / \text{cm}^2 \cdot \text{s}^{-1}$ | $E_a / \text{kJ}\cdot\text{mol}^{-1}$ | $\alpha$ |
|-----------|-----|--------------------------------------------------------|---------------------------------------|----------|
| Eu(III)   | 293 | 96.86                                                  | 59.09                                 | 0.151    |
|           | 308 | 271.2                                                  |                                       | 0.285    |
|           | 323 | 1171                                                   |                                       | 0.492    |
|           | 338 | 2285                                                   |                                       | 0.530    |
| Sm(III)   | 293 | 0.7561                                                 | 18.94                                 | 0.206    |
|           | 308 | 1.114                                                  |                                       | 0.296    |
|           | 323 | 1.558                                                  |                                       | 0.347    |
|           | 338 | 2.110                                                  |                                       | 0.368    |
| Dy(III)   | 293 | 1.092                                                  | 27.22                                 | 0.208    |
|           | 308 | 1.882                                                  |                                       | 0.318    |
|           | 323 | 2.987                                                  |                                       | 0.364    |
|           | 338 | 4.813                                                  |                                       | 0.389    |
| Nd(III)   | 293 | 1.054                                                  | 20.39                                 | 0.217    |
|           | 308 | 1.416                                                  |                                       | 0.322    |
|           | 323 | 2.203                                                  |                                       | 0.347    |
|           | 338 | 3.108                                                  |                                       | 0.363    |

doi:10.1371/journal.pone.0095832.t002

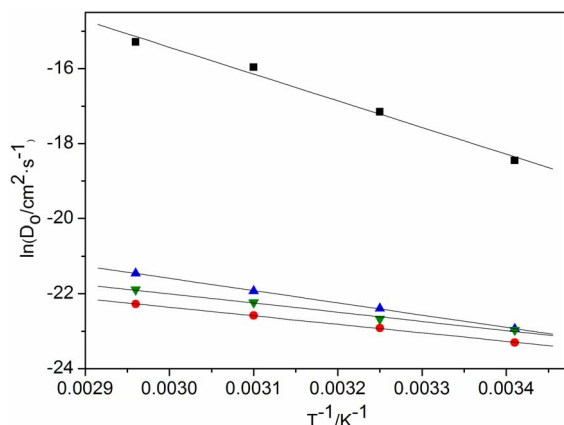

**Figure 5. Plots of  $\ln D_0$  against  $T^{-1}$ , ■, Eu(III); •, Sm(III); ▲, Dy(III); ▼, Nd(III) measured in BmimBr at GC electrode.**  
doi:10.1371/journal.pone.0095832.g005

increases when the temperature increases. The lower viscosity of BmimBr at higher temperature may advantage electron transfer at electrode-electrolyte interphase. Thus, an increase of  $k_s$  for Eu(III) in BmimBr can be found at higher temperature. According to the value of  $k_s$ , the electrode reaction can be summarized to be reversible ( $k_s \geq 0.3 \text{ v}^{1/2} \text{ cm} \cdot \text{s}^{-1}$ ), quasi-reversible ( $0.3 \text{ v}^{1/2} \geq k_s \geq 2 \times 10^{-5} \text{ v}^{1/2} \text{ cm} \cdot \text{s}^{-1}$ ), and irreversible ( $k_s \leq 2 \times 10^{-5} \text{ v}^{1/2} \text{ cm} \cdot \text{s}^{-1}$ ). A quasi-reversible electrode reaction of Eu(III) to Eu(II) is confirmed by the values of  $k_s$ .

#### 4. Determination of Gibbs Energy Change of Eu(III) in BmimBr

Gibbs energy,  $\Delta G$ , is of central importance to reaction. The reduction of Eu(III) to Eu(II) in BmimBr is simply described as:

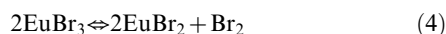

For a dilute solution system, its activity coefficient is negligible. Assuming Eu(III) in BmimBr forms a dilute solution, thus, the standard Gibbs energy of the reaction  $\text{EuBr}_2 + 1/2\text{Br}_2 \rightarrow \text{EuBr}_3$  can be identified by the expression (5).

$$\Delta G^0(\text{EuBr}_3) = -nFE_{\text{Eu(II)/Eu(III)}}^{0*} \quad (5)$$

where  $E_{\text{Eu(II)/Eu(III)}}^{0*}$  is the apparent standard potential of oxidation of Eu(II) to Eu(III). The apparent standard potential,  $E_{\text{Eu(II)/Eu(III)}}^{0*}$ , is associated with its cathodic and anodic peak potentials. The relation between  $E_{\text{Eu(III)/Eu(II)}}^{0*}$  and  $E_p^c$  (and  $E_p^a$ ) is given as:

$$E_p^a = E_{\text{Eu(III)/Eu(II)}}^{0*} + 1.11 \frac{RT}{nF} - \frac{RT}{nF} \ln \left( \frac{\sqrt{D_{\text{Eu(III)}}}}{\sqrt{D_{\text{Eu(II)}}}} \right) \quad (6)$$

$$E_p^c = E_{\text{Eu(III)/Eu(II)}}^{0*} - 1.11 \frac{RT}{nF} - \frac{RT}{nF} \ln \left( \frac{\sqrt{D_{\text{Eu(III)}}}}{\sqrt{D_{\text{Eu(II)}}}} \right) \quad (7)$$

Because the reduction of Eu(III) to Eu(II) involves a single electron transfer,  $n$  is equal to 1,  $E_{\text{Eu(III)/Eu(II)}}^{0*}$  can be expressed as equation (8), as a function of temperature.

$$E_{\text{Eu(III)/Eu(II)}}^{0*} = \frac{E_p^c + E_p^a}{2} + \frac{RT}{F} \ln \left( \frac{\sqrt{D_{\text{Eu(III)}}}}{\sqrt{D_{\text{Eu(II)}}}} \right) \quad (8)$$

From linear regression of the experimental data, (Figure 6) the equation for the apparent standard potential  $E_{\text{Eu(III)/Eu(II)}}^{0*}$  (equation (9)) has the form:

$$E_{\text{Eu(III)/Eu(II)}}^{0*} = -0.668 + 6.67 \times 10^{-4} T(\text{K}) \text{ vs } (\text{Br}_2/\text{Br}^-) \quad (9)$$

This expression, which shows that a change in  $E_{\text{Eu(III)/Eu(II)}}^{0*}$  is proportional to a change in  $T$ , suggests that  $E_{\text{Eu(III)/Eu(II)}}^{0*}$  can be regarded as a function of  $T$ . A linear correlation of  $E_{\text{Eu(III)/Eu(II)}}^{0*}$  with temperature is found.

Based on equations (5) and (9), the standard Gibbs energy expression is

$$\Delta G_{\text{EuBr}_3}^0 (\text{kJ} \cdot \text{mol}^{-1}) = -64.46 + 64.37 \times 10^{-3} T(\text{K}) \quad (10)$$

The standard Gibbs energy is found to be a linear function of temperature. The standard Gibbs energy of reaction is expressed, combined with standard entropy and enthalpy of reaction:  $\Delta G = \Delta H - T\Delta S$ . The expression of equation (10) shows that the standard entropy ( $\Delta S_{\text{EuBr}_3}^0$ ) of the reaction  $\text{EuBr}_2 + 1/2\text{Br}_2 \rightarrow \text{EuBr}_3$  is negative. The result indicates that a decrease in the entropy of the reaction occurs, along with the formation of less disordered EuBr<sub>3</sub> from higher disordered substrates.

## Materials and Methods

### 1. Chemicals

All chemicals of analytical grade, 1-methylimidazole, 1-bromobutane, Eu<sub>2</sub>O<sub>3</sub>, Sm<sub>2</sub>O<sub>3</sub>, Dy<sub>2</sub>O<sub>3</sub> and Nd<sub>2</sub>O<sub>3</sub> were obtained

**Table 3. Rate constants ( $k_s$ ), peak potentials ( $E_p^c$  and  $E_p^a$ ) of Eu(III) in BmimBr at different temperatures.**

| Metal ion | T/K | $E_p^c$ /V | $E_p^a$ /V | $k_s \times 10^5 / \text{cm} \cdot \text{s}^{-1}$ |
|-----------|-----|------------|------------|---------------------------------------------------|
| Eu(III)   | 293 | -0.893     | -0.121     | 7.422                                             |
|           | 308 | -0.639     | -0.320     | 14.37                                             |
|           | 323 | -0.565     | -0.356     | 16.23                                             |
|           | 338 | -0.557     | -0.352     | 19.07                                             |

doi:10.1371/journal.pone.0095832.t003



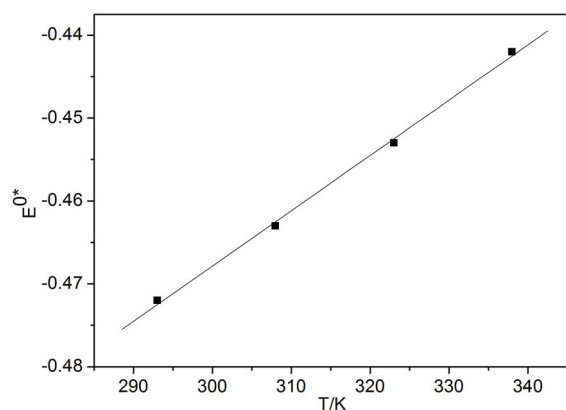

**Figure 6.** Plots of  $E^{\circ*}_{Eu(III)/Eu(II)}$  against  $T$ . doi:10.1371/journal.pone.0095832.g006

commercially. Infrared spectra (IR) were recorded by KBr plates on a Nicolet NEXUS 670 FT-IR spectrometer.  $^1\text{H}$  and  $^{13}\text{C}$  NMR spectra were recorded on a Bruker 400 MHz nuclear magnetic resonance spectrometer with  $\text{CDCl}_3$  as locking solvent unless otherwise stated.  $^1\text{H}$  and  $^{13}\text{C}$  chemical shifts were reported in ppm relative to TMS. Water content was determined by coulometric Karl-Fischer titration.

Preparation of  $\text{LnBr}_3$  ( $\text{Ln} = \text{Eu}, \text{Sm}, \text{Dy}, \text{Nd}$ ).  $\text{Ln}_2\text{O}_3$  (0.25 mmol) was dispersed in trace water. A slightly excess of hydrobromic acid was added into the solution. The resulting mixture was stirred and heated to remove the excess hydrobromic acid. The crude product was dried in vacuum for 12 h at  $100^\circ\text{C}$  to yield the desired  $\text{LnBr}_3 \cdot n\text{H}_2\text{O}$ .

Synthesis of 1-butyl-3-methylimidazolium bromide (BmimBr). 1-Methylimidazole (32.84 g, 400 mmol) was dissolved in toluene (50 mL). 1-Bromobutane (57.55 g, 420 mmol) was added dropwise into the resultant solution with vigorous stirring at room temperature. The resulting mixture was stirred for 24 h at room temperature. The toluene layer was removed, and the residue was dried in vacuum for 1 h at  $80^\circ\text{C}$  to produce a colorless transparent liquid. (61.68 g, 94%) Water content 1.35 wt%. IR (KBr,  $\text{cm}^{-1}$ ): 3125 (s), 3081 (vs), 2956 (vs), 2868 (vs), 1566 (vs), 1461 (vs), 1168 (vs), 755 (m).  $^1\text{H}$ -NMR ( $\text{CDCl}_3$ ,  $\delta/\text{ppm}$ ): 9.98 (s, 1H), 7.51 (s, 1H),

7.38 (s, 1H), 4.07 (t, 2H,  $J = 7.2$  Hz), 3.84 (s, 3H), 1.60 (m, 2H), 1.07 (m, 2H), 0.66 (t, 3H,  $J = 7.5$  Hz).  $^{13}\text{C}$ -NMR ( $\text{CDCl}_3$ ,  $\delta/\text{ppm}$ ): 135.85, 122.79, 121.27, 48.63, 35.58, 31.07, 18.31, 12.28.

## 2. Cyclic Voltammetry Measurements

Measurements were performed in the temperature range 293–338 K. A typical three-electrode cell was employed, with the composition of a glassy carbon (GC) rod working electrode ( $0.1256 \text{ cm}^2$ ), a platinum gauze counter electrode, and a silver/silver ion ( $0.1 \text{ mol} \cdot \text{L}^{-1} \text{ Ag}^+$  in  $\text{CH}_3\text{CN}$ ) quasi-reference electrode. The electrochemical cell had a single leak-tight compartment and all the electrodes were placed in a compartment. The cell was kept under nitrogen atmosphere during entire study. Prior to measurements, the GC electrode were polished with a slurry aluminum oxide ( $0.05 \mu\text{m}$ ), and were washed with deionized water and ethanol.

## Conclusions

The electrochemical behaviors of Eu(III), Sm(III), Dy(III) and Nd(III) in BmimBr at GC electrode from 293 K to 398 K were investigated. The cyclic voltammograms of Eu(III) exhibited quasi-reversible waves, while the cyclic voltammograms of Sm(III), Dy(III) and Nd(III) comprised of irreversible waves. An increase in current intensity was observed along with the increase of temperature. The diffusion coefficients, the transfer coefficients, and the activation energies of Ln(III) ( $\text{Ln} = \text{Eu}, \text{Sm}, \text{Dy}, \text{Nd}$ ), and the charge transfer rate constants of Eu(III) were also calculated. The diffusion coefficient of Eu(III) is much larger than those of the other three lanthanide ions with the magnitude of  $\sim 10^{-8} \text{ cm}^2 \cdot \text{s}^{-1}$  at 293 K. Such a feature shows that there is a potential for selective separation of Eu from other lanthanides by electrochemical methods. The apparent standard potentials,  $E^{\circ*}_{Eu(III)/Eu(II)}$ , and the standard Gibbs energy were also determined.

## Author Contributions

Conceived and designed the experiments: GHT. Performed the experiments: XY SQ. Analyzed the data: XY LH SQ GHT. Contributed reagents/materials/analysis tools: SQ MH YL. Wrote the paper: XY LH GHT.

## References

- Vasanth T, Attri P, Venkatesu P, Devi RSR (2013) Ammonium based ionic liquids act as compatible solvents for glycine peptides. *J Chem Thermodyn* 56: 21–31.
- Abedin SZE, Endres F (2007) Ionic liquids: The link to high-temperature molten salts? *Acc Chem Res* 40: 1106–1113.
- Tao GH, He L, Liu WS, Xu L, Xiong W, et al. (2006) Preparation, characterization and application of amino acid-based green ionic liquids. *Green Chem* 8: 639–646.
- Carneiro AP, Rodríguez O, Macedo EA (2012) Solubility of xylitol and sorbitol in ionic liquids – Experimental data and modeling. *J Chem Thermodyn* 55: 184–192.
- Tao GH, Zou M, Wang XH, Chen ZY, Evans DG, et al. (2005) Comparison of polarities of room-temperature ionic liquids using FT-IR spectroscopic probes. *Aust J Chem* 58: 327–331.
- Paduszynski K, Domańska U (2013) Experimental and theoretical study on infinite dilution activity coefficients of various solutes in piperidinium ionic liquids. *J Chem Thermodyn* 60: 169–178.
- Earle MJ, Gordon CM, Plechkova NV, Seddon KR, Welton T (2007) Decolorization of ionic liquids for spectroscopy. *Anal Chem* 79: 758–764.
- Hallett JP, Welton T (2011) Room-temperature ionic liquids: Solvents for synthesis and catalysis. 2. *Chem Rev* 111: 3508–3576.
- Wasserscheid P, Keim W (2000) Ionic liquids—new “solutions” for transition metal catalysis. *Angew Chem Int Ed* 39: 3772–3789.
- Kazemi S, Peters CJ, Kroon MC (2013) Effect of carbon dioxide addition on the phase behavior of epoxidation reaction mixtures in ionic liquids. *J Chem Eng Data* 58: 1597–1601.
- Wilkes JS (2004) Properties of ionic liquid solvents for catalysis. *J Mol Catal A: Chem* 214: 11–17.
- Dong LL, He L, Tao GH, Hu CW (2013) High yield of ethyl valerate from the esterification of renewable valeric acid catalyzed by amino acid ionic liquids. *RSC Adv* 3: 4806–4813.
- Jiang T, Han BX (2009) Ionic liquid catalytic systems and chemical reactions. *Curr Org Chem* 13: 1278–1299.
- Dupont J, Scholtena JD (2010) On the structural and surface properties of transition-metal nanoparticles in ionic liquids. *Chem Soc Rev* 39: 1780–1804.
- Kou Y, He L (2008) Ionic liquids in green chemistry: Today’s solvent or tomorrow’s solution? *Prog Chem* 20: 6–10.
- Ye CF, Liu WM, Chen YX, Yu LG (2001) Room-temperature ionic liquids: A novel versatile lubricant. *Chem Commun* 2001: 2244–2245.
- Galiński M, Lewandowski A, Stepniak I (2006) Ionic liquids as electrolytes. *Electrochim Acta* 51: 5567–5580.
- Sato T, Maruo T, Marukane S, Takagi K (2004) Ionic liquids containing carbonate solvent as electrolytes for lithium ion cells. *J Power Sources* 138: 253–261.
- Barrosse-Antle LE, Bond AM, Compton RG, O’Mahony AM, Rogers EI, et al. (2010) Voltammetry in room temperature ionic liquids: Comparisons and contrasts with conventional electrochemical solvents. *Chem Asian J* 5: 202–230.
- Lewandowski A, Świdarska-Mocek A (2009) Ionic liquids as electrolytes for Li-ion batteries—An overview of electrochemical studies. *J Power Sources* 194: 601–609.
- Armand M, Endres F, MacFarlane DR, Ohno H, Scrosati B (2009) Ionic-liquid materials for the electrochemical challenges of the future. *Nat Mater* 8: 621–629.

22. Wang JS, Sheaff CN, Yoon B, Addleman S, Wai CM (2009) Extraction of uranium from aqueous solutions by using ionic liquid and supercritical carbon dioxide in conjunction. *Chem Eur J* 15: 4458–4463.
23. Visser AE, Swatoski RP, Reichert WM, Mayton R, Sheff S, et al. (2001) Task-specific ionic liquids for the extraction of metal ions from aqueous solutions. *Chem Commun* 2001: 135–136.
24. Hayashi S, Saha S, Hamaguchi H (2006) A new class of magnetic fluids: bmim[FeCl<sub>4</sub>] and nbmim[FeCl<sub>4</sub>] ionic liquids. *IEEE Trans Magn* 42: 12–14.
25. Del Sesto RE, McCleskey TM, Burrell AK, Baker GA, Thompson JD, et al. (2008) Structure and magnetic behavior of transition metal based ionic liquids. *Chem Commun* 2008: 447–449.
26. Bäcker T, Breunig O, Valldor M, Merz K, Vasylyeva V, et al. (2011) In-situ crystal growth and properties of the magnetic ionic liquid [C<sub>2</sub>mim][FeCl<sub>4</sub>]. *Cryst Growth Des* 11: 2564–2571.
27. Lunstrook K, Driesen K, Nockemann P, Görller-Walrand C, Binnemans K, et al. (2006) Luminescent ionogels based on europium-doped ionic liquids confined within silica-derived networks. *Chem Mater* 18: 5711–5715.
28. Mallick B, Balke B, Felser C, Mudring AV (2008) Dysprosium room-temperature ionic liquids with strong luminescence and response to magnetic fields. *Angew Chem Int Ed* 47: 7635–7638.
29. Tao GH, Guo Y, Joo YH, Twamley B, Shreeve JM (2008) Energetic nitrogen-rich salts and ionic liquids: 5-Aminotetrazole (AT) as a weak acid. *J Mater Chem* 18: 5524–5530.
30. He L, Tao GH, Parrish DA, Shreeve JM (2010) Nitrocyamide-based ionic liquids and their potential applications as hypergolic fuels. *Chem Eur J* 16: 5736–5743.
31. He L, Tao GH, Parrish DA, Shreeve JM (2011) Liquid dinitromethanide salts. *Inorg Chem* 50: 679–685.
32. Tao GH, Tang M, He L, Ji SP, Nie FD, et al. (2012) Synthesis, structure and property of 5-aminotetrazolate room temperature ionic liquids. *Eur J Inorg Chem* 3070–3078.
33. Dong LL, He L, Liu HY, Tao GH, Nie FD, et al. (2013) Nitrogen-rich energetic ionic liquids based on the N,N-bis(1H-tetrazol-5-yl)amine anion: syntheses, structures and properties. *Eur J Inorg Chem* 5009–5019.
34. Hapiot P, Lagrost C (2008) Electrochemical reactivity in room-temperature ionic liquids. *Chem Rev* 108: 2238–2264.
35. Berthod A, Ruiz-Ángel MJ, Carda-Broch S (2008) Ionic liquids in separation techniques. *J Chromatogr A* 1184: 6–18.
36. Wasserscheid P, Welton T, eds. (2002) *Ionic Liquids in Synthesis*. Wiley-VCH Verlag GmbH & Co. KGaA, ISBNs: 3-527-30515-7 (Hardback); 3-527-60070-1 (Electronic).
37. Zhao F, Wu X, Wang MK, Liu Y, Gao LX, et al. (2004) Electrochemical and bioelectrochemistry properties of room-temperature ionic liquids and carbon composite materials. *Anal Chem* 76: 4960–4967.
38. Quinn BM, Ding ZF, Moulton R, Bard AJ (2002) Novel electrochemical studies of ionic liquids. *Langmuir* 18: 1734–1742.
39. Wei D, Ivaska A (2008) Applications of ionic liquids in electrochemical sensors. *Anal Chim Acta* 607: 126–135.
40. Ji SP, Tang M, He L, Tao GH (2013) Water-free rare earth metal ionic liquids/ionic liquid crystals based on hexanitratolanthanate(III) anion. *Chem Eur J* 19: 4452–4461.
41. Park HJ, Tavlardis LL (2010) Adsorption of neodymium(III) from aqueous solutions using a phosphorus functionalized adsorbent. *Ind Eng Chem Res* 49: 12567–12575.
42. Sun XQ, Luo H, Dai S (2012) Ionic liquids-based extraction: A promising strategy for the advanced nuclear fuel cycle. *Chem Rev* 112: 2100–2128.
43. Kuznetsov SA, Hayashi H, Minato K, Gaune-Escard M (2006) Electrochemical transient techniques for determination of uranium and rare-earth metal separation coefficients in molten salts. *Electrochim Acta* 51: 2463–2470.
44. Yamagata M, Katayama Y, Miura T (2006) Electrochemical behavior of samarium, europium, and ytterbium in hydrophobic room-temperature molten salt systems. *J Electrochem Soc* 153: E5–E9.
45. Rao CJ, Venkatesan KA, Nagarajan K, Srinivasan TG, Rao PRV (2009) Electrochemical behavior of europium (III) in N-butyl-N-methylpyrrolidinium bis(trifluoromethylsulfonyl)imide. *Electrochim Acta* 54: 4718–4725.
46. Matsumiya M, Suda S, Tsunashima K, Sugiyama M, Kishioka SY, et al. (2008) Electrochemical behaviors of multivalent complexes in room temperature ionic liquids based on quaternary phosphonium cations. *J Electroanal Chem* 622: 129–135.
47. Bhatt AI, May I, Volkovich VA, Collison D, Helliwell M, et al. (2005) Structural characterization of a lanthanum bistriflimide complex, La(N(SO<sub>2</sub>CF<sub>3</sub>)<sub>2</sub>)<sub>3</sub>(H<sub>2</sub>O)<sub>3</sub>, and an investigation of La, Sm, and Eu electrochemistry in a room-temperature ionic liquid, [Me<sub>3</sub>N<sup>+</sup>Bu][N(SO<sub>2</sub>CF<sub>3</sub>)<sub>2</sub>]. *Inorg Chem* 44: 4934–4940.
48. Bhatt AI, Duffy NW, Collison D, May I, Lewin RG (2006) Cyclic voltammetry of Th(IV) in the room-temperature ionic liquid [Me<sub>3</sub>N<sup>+</sup>Bu][N(SO<sub>2</sub>CF<sub>3</sub>)<sub>2</sub>]. *Inorg Chem* 45: 1677–1682.
49. Bhatt AI, May I, Volkovich VA, Hetherington ME, Lewin B, et al. (2002) Group 15 quaternary alkyl bistriflimides: ionic liquids with potential application in electropositive metal deposition and as supporting electrolytes. *J Chem Soc Dalton Trans* 2002: 4532–4534.
50. Ramenskaya LM, Grishina EP, Pimenova AM, Gruzdev MS (2008) The Influence of Water on the Physicochemical Characteristics of 1-Butyl-3-methylimidazolium Bromide Ionic Liquid. *Russ J Phys Chem A* 82: 1098–1103.
51. Jayakumar M, Venkatesan KA, Srinivasan TG (2007) Electrochemical behavior of fission palladium in 1-butyl-3-methylimidazolium chloride. *Electrochim Acta* 52: 7121–7127.
52. Bard AJ, Faulkner LR (1980) *Electrochemical methods – Fundamentals and applications*, second ed. New York: Wiley.
53. Brown ER, Sandifer JR (1986) Cyclic voltammetry, AC polarography and related techniques. In: Rossiter BW, Hamilton JF, editors. *Physical Methods of Chemistry, Electrochemical Methods*, New York: Wiley, Vol. 2.
